# Supplementary material for: Coinfection of Dermal Fibroblasts by Human Cytomegalovirus and Human Herpesvirus 6 Can Boost the Expression of Fibrosis-Associated MicroRNAs
Source: MDPI journal article supplement (doi:10.3390/microorganisms11020412), 2023-02-06
Supplement: s1 [file s1]

Table S1. miRNA expression in single- and dual-infected cells (\*).

|                        | Time post-infection |       |                 |          |        |                 |          |        |                 |          |       |                 |          |        |                 |
|------------------------|---------------------|-------|-----------------|----------|--------|-----------------|----------|--------|-----------------|----------|-------|-----------------|----------|--------|-----------------|
|                        | 0 d.p.i.            |       |                 | 1 d.p.i. |        |                 | 2 d.p.i. |        |                 | 4 d.p.i. |       |                 | 7 d.p.i. |        |                 |
| miRNA ID               | HHV-6A              | HCMV  | HCMV/<br>HHV-6A | HHV-6A   | HCMV   | HCMV/<br>HHV-6A | HHV-6A   | HCMV   | HCMV/<br>HHV-6A | HHV-6A   | HCMV  | HCMV/<br>HHV-6A | HHV-6A   | HCMV   | HCMV/<br>HHV-6A |
| <i>hsa-let-7d-5p</i>   | 1.21                | 1.05  | -2.03           | 1.08     | -1.13  | -1.11           | 1.29     | -1.04  | 1.37            | 2.08     | 3.34  | 2.95            | -1       | 1.85   | 1.8             |
| <i>hsa-miR-1-3p</i>    | 3.17                | 1.09  | -1.37           | 1.01     | 1.12   | -1.22           | -4.13    | -4.58  | 3.06            | -3.16    | 11.18 | 5.82            | 3.43     | 39.18  | 107.3           |
| <i>hsa-miR-101-3p</i>  | -1.07               | 1.01  | -1.43           | -1.1     | -1.22  | -1.2            | 1.2      | -1.03  | 1.91            | -1.78    | 1.75  | 1.98            | -2.29    | 2.27   | 1.86            |
| <i>hsa-miR-107</i>     | 1.34                | 1.53  | -1.58           | 1.02     | -1.48  | -1.45           | -1.04    | -1.38  | 1.22            | 1.96     | 2.17  | 2.88            | -1.03    | 1.43   | 2.21            |
| <i>hsa-miR-10a-5p</i>  | -1.29               | 1.52  | -3.12           | -1.51    | -2.26  | -1.65           | -1.56    | -3.93  | -1.15           | 2        | 1.78  | 1.99            | -1.44    | -2.43  | -1.23           |
| <i>hsa-miR-10b-5p</i>  | -1.08               | 0.09  | -1.82           | 1.77     | 1.23   | 1.33            | 1.23     | 1.01   | 1.68            | 2.05     | 2.09  | 3.11            | -1.08    | 1.38   | 1.53            |
| <i>hsa-miR-122-5p</i>  | -2                  | -2.01 | -1.37           | 1.01     | 1.12   | -1.22           | 2.54     | 2.29   | 4.58            | 21.94    | 44.81 | 187.5           | 3.43     | 31.23  | 82.16           |
| <i>hsa-miR-125b-5p</i> | 1.03                | -1.5  | -1.83           | 1.11     | -1.49  | -1.51           | -1.06    | -1.17  | 1.23            | 1.76     | 2.41  | 2.26            | -1.3     | 1.43   | -1.01           |
| <i>hsa-miR-126-3p</i>  | -1.85               | -1.89 | -2.73           | -1.3     | -3.05  | -3.44           | 1.01     | 1.59   | 1.02            | 2.17     | 2.92  | 4.47            | -1.53    | -1.28  | 2.82            |
| <i>hsa-miR-129-5p</i>  | 3.54                | 2.58  | -1.37           | 10.3     | 1.12   | -1.22           | -13.75   | -15.23 | 3.45            | 1.81     | 1.66  | 65.72           | -8.32    | 2.03   | 17.79           |
| <i>hsa-miR-132-3p</i>  | 1.26                | 1.01  | 1.11            | -1.95    | 1.09   | 1.94            | -1.19    | 1.39   | 1.82            | 1.65     | 3.2   | 2.95            | 1.73     | 4.77   | 4               |
| <i>hsa-miR-133a-3p</i> | -2                  | 5.987 | 3.78            | 4.34     | 1.12   | -1.22           | 2.54     | 13.44  | 15.52           | 9.86     | 26.76 | 10.46           | 15.93    | 20.55  | 13.84           |
| <i>hsa-miR-141-3p</i>  | -3.45               | -2.32 | -2.69           | 7.54     | 27.59  | 15.51           | -9.42    | 1.36   | -24.82          | 8.83     | 1.66  | 5.06            | 11.77    | 18.28  | 19.7            |
| <i>hsa-miR-142-3p</i>  | 26.83               | 25.26 | 5.57            | 12.12    | 1.12   | 22.97           | 2.87     | 13.88  | 13.16           | 9.31     | 3.57  | 7.23            | -22.9    | 16.9   | -12.83          |
| <i>hsa-miR-143-3p</i>  | 1.02                | 1.05  | -1.44           | 1.42     | -1.41  | -1.02           | 1.01     | -1.08  | 1.48            | 1.94     | 4.39  | 2.06            | 1.01     | 2.86   | -1.23           |
| <i>hsa-miR-145-5p</i>  | 1.05                | 1     | -1.19           | 1.18     | -1.37  | -1.29           | 1.11     | -1.24  | 1.21            | 2.52     | -4.15 | 2.02            | 1.32     | 1.01   | -9.83           |
| <i>hsa-miR-146a-5p</i> | -1.06               | -1.5  | -1.81           | 1.22     | 1.13   | 1.24            | -1.19    | -1.86  | 1.46            | -1.95    | 9.15  | 3.51            | -3.3     | 8.25   | 2.74            |
| <i>hsa-miR-146b-5p</i> | 1.26                | 1.56  | -1.32           | 1.25     | 1.23   | -1.69           | -1.23    | -1.23  | 1.61            | 3.03     | 8.59  | 7.04            | -1.58    | 3.05   | 3.44            |
| <i>hsa-miR-148a-3p</i> | 1.03                | 1.06  | -1.34           | 1.5      | -1.17  | 1.25            | 1.04     | -1.26  | 1.59            | -1.08    | -2.07 | 2.47            | -1.72    | -1.84  | 1.46            |
| <i>hsa-miR-150-5p</i>  | 36.63               | 25.98 | 52.51           | 15.74    | 1.12   | 75.2            | 1.03     | 15.4   | 23.45           | 30.54    | 20.19 | 54.25           | -1.62    | -2.89  | 4.46            |
| <i>hsa-miR-155-5p</i>  | -1.08               | -1    | -1.3            | 1.11     | 1.64   | 1.21            | 1.41     | 1.36   | 2.75            | 3.6      | 3.19  | 63.32           | 2.71     | 1.57   | 4.07            |
| <i>hsa-miR-15b-5p</i>  | 1.71                | 1.56  | 1.04            | 1.97     | 1.45   | 2.15            | 1.21     | 1.06   | 2.01            | 1.91     | 1.13  | 3.42            | 1        | -1.18  | 1.94            |
| <i>hsa-miR-16-5p</i>   | 1.14                | 1.34  | -1.45           | 1.27     | -1.1   | 1.02            | 1.09     | 1.25   | 1.87            | 1.27     | 1.78  | 3.04            | -1.68    | 1.67   | 1.61            |
| <i>hsa-miR-17-5p</i>   | -1.05               | 1.62  | 1.03            | 1.38     | 1.14   | 1.11            | 1.11     | 1.54   | 1.75            | 1.13     | 2.08  | 2.47            | -1.29    | 1.39   | 1.91            |
| <i>hsa-miR-18a-5p</i>  | -1.01               | -1.06 | -2.63           | 1.33     | -1.17  | 1.38            | 1.13     | 2.21   | 1.79            | 2.95     | 2.17  | -5.11           | -1.77    | 1.22   | -3.22           |
| <i>hsa-miR-192-5p</i>  | -1.65               | 1.05  | 1.26            | -1.5     | 1.37   | 1.04            | 1.41     | 1.06   | 3.1             | 1.44     | 4.98  | 9.82            | -1.38    | 3.91   | 11.12           |
| <i>hsa-miR-194-5p</i>  | 1.22                | -1.09 | -2.89           | -1.09    | -1.92  | 1.26            | -1.31    | 1.07   | 1.37            | 1.86     | 3.01  | -4.14           | 1.79     | 3.06   | -2.14           |
| <i>hsa-miR-195-5p</i>  | -1.19               | -1.02 | -1.71           | 1.78     | -1.2   | -1.06           | 1.38     | -1.08  | 2.25            | 1.16     | 3.26  | 4.79            | -2.45    | 2.82   | 1.09            |
| <i>hsa-miR-196a-5p</i> | 1.02                | 1.03  | -1.42           | 1.27     | -1.27  | 1.02            | 1.28     | 1.16   | 1.44            | 2.5      | 2.46  | 1.79            | 1.3      | 1.5    | -1.83           |
| <i>hsa-miR-199a-5p</i> | 1.29                | 1.02  | -1.26           | 1.5      | -1.16  | 1.06            | 1.1      | -1.49  | 1.1             | 1.34     | 1.3   | 2.17            | -1.53    | 1.37   | -1.69           |
| <i>hsa-miR-199b-5p</i> | 1.08                | 1.01  | -1.38           | 1.1      | -1.45  | -1.36           | 1.23     | -1.31  | 1.25            | -1.29    | -1.53 | 3.1             | -2.27    | -1.53  | 2.88            |
| <i>hsa-miR-19a-3p</i>  | 1.05                | 1.52  | -1.66           | 1.28     | 1.08   | 1.07            | 1.41     | 1.17   | 1.96            | -1.11    | 2.23  | 3.47            | -1.81    | 1.7    | 5.78            |
| <i>hsa-miR-19b-3p</i>  | 1.34                | 1.34  | -1.57           | 1.57     | -1     | 1.03            | 1.1      | 1.01   | 1.76            | -1.18    | 2.38  | 69.24           | -2.01    | 1.48   | 42.93           |
| <i>hsa-miR-200a-3p</i> | -2                  | -1.98 | -1.37           | 1.01     | 1.12   | -1.22           | 2.54     | 2.29   | -3.52           | 1.81     | 20.72 | -8.04           | -1.12    | 22.06  | -3.14           |
| <i>hsa-miR-200b-3p</i> | -2                  | -1.65 | -1.37           | 1.97     | 23.2   | -1.22           | -1.56    | -10.45 | 4.48            | -22.4    | 1.45  | 337.25          | 1.42     | 2.16   | 1321.79         |
| <i>hsa-miR-203a-3p</i> | -2                  | 2.98  | -3.61           | 35.32    | 1.12   | -4.52           | -14.12   | 2.04   | -18.04          | 1.81     | 1.66  | -1.14           | 3.43     | 108.15 | -2.4            |
| <i>hsa-miR-204-5p</i>  | 2.34                | 1.05  | 1.42            | 1.49     | -1.41  | 1.55            | -2.35    | -1.02  | 1.44            | 2.75     | 9.82  | 1.51            | 1.32     | 7.76   | 2.16            |
| <i>hsa-miR-208a-3p</i> | -2                  | 1.03  | -1.37           | 1.01     | 1.12   | -1.22           | 2.54     | 2.29   | 1.98            | 2.38     | 1.66  | 2.49            | 3.43     | 2.25   | 1.28            |
| <i>hsa-miR-20a-5p</i>  | 1.13                | 1     | -1.6            | 1.22     | -1.03  | -1.08           | 1.38     | 1.41   | 1.91            | 1.18     | 1.71  | -8.51           | -1.53    | 1.68   | -5.84           |
| <i>hsa-miR-211-5p</i>  | -2                  | -1.65 | -1.37           | 1.01     | 1.12   | -1.22           | 2.54     | 2.29   | 1.98            | -6.24    | -6.79 | 2.79            | -3.51    | -5.37  | -35.37          |
| <i>hsa-miR-215-5p</i>  | 1.42                | -2.99 | -15.47          | 2.33     | 2.64   | 3.89            | -1.47    | -2.96  | 3.98            | 2.66     | 4.09  | 12.37           | 1.55     | 2.54   | 3.01            |
| <i>hsa-miR-21-5p</i>   | 1.16                | 1.52  | -1.3            | 1.3      | -1.03  | -1.04           | 1.47     | 1.15   | 2.07            | 1.14     | 4.72  | 1.51            | -1.34    | 4.36   | 2.16            |
| <i>hsa-miR-216a-5p</i> | 1.75                | 3.23  | 6.06            | 4.17     | -21.61 | -2.55           | -3.8     | -4.21  | -4.86           | 1.81     | 18.55 | 1.51            | 3.43     | 2.25   | 12.16           |

|                        |       |       |       |        |       |        |        |        |        |        |        |       |        |        |        |
|------------------------|-------|-------|-------|--------|-------|--------|--------|--------|--------|--------|--------|-------|--------|--------|--------|
| <i>hsa-miR-217</i>     | -2    | -1.45 | -1.37 | 1.01   | 1.12  | -1.22  | -7.91  | -8.77  | -10.11 | 1.81   | 1.66   | 1.51  | 3.43   | 2.25   | 2.16   |
| <i>hsa-miR-223-3p</i>  | 14.61 | 22.54 | 9.23  | -45.3  | 1.4   | -55.67 | 2.54   | 25.66  | -3.91  | 1.81   | 1.66   | -5.05 | 3.43   | 7.42   | -5.11  |
| <i>hsa-miR-23a-3p</i>  | 1.05  | 1.35  | -1.58 | 1.1    | -1.24 | -1.44  | 1.12   | 1.01   | 1.28   | 1.16   | -1.96  | 3.12  | -1.32  | -1.44  | -1.09  |
| <i>hsa-miR-25-3p</i>   | 1.09  | 1.31  | -1.17 | 1.01   | -1.45 | -1.49  | 1.52   | 1.15   | 2.2    | 3      | 3.15   | 2.35  | 1.16   | 1.48   | 1.32   |
| <i>hsa-miR-26a-5p</i>  | 1.08  | 1.22  | -1.31 | 1.44   | -1.03 | -1.02  | 1.31   | 1.11   | 1.47   | 2.13   | 2.84   | 3     | -1.19  | 1.74   | 2.01   |
| <i>hsa-miR-26b-5p</i>  | -1.26 | 1.55  | -2.4  | 1.51   | -1.37 | -1.16  | -1.05  | -1.12  | 1.54   | 1.52   | 2.41   | 2.46  | -1.85  | 1.2    | 1.35   |
| <i>hsa-miR-27a-3p</i>  | 1     | 1     | -1.83 | 1.28   | -1.23 | -1.22  | 1.26   | 1.27   | 1.23   | 1.13   | -1.61  | 1.51  | 1.67   | 2.39   | 2.16   |
| <i>hsa-miR-27b-3p</i>  | 1.3   | 1.05  | -1.53 | 1.47   | -1.33 | -1.16  | 1.23   | -1.01  | 1.04   | -1.11  | -1.15  | 2.52  | -1.6   | 1.31   | -1.19  |
| <i>hsa-miR-29a-3p</i>  | 1.39  | 1.09  | -1.53 | 1.05   | -1.24 | -1.24  | -1.02  | -1.04  | 1.54   | -1.48  | 1.18   | 2.25  | -2.59  | -1.07  | 1.16   |
| <i>hsa-miR-29b-3p</i>  | 1.21  | 1.21  | -2.15 | 1.39   | 1.15  | 1.17   | -1.18  | -1.58  | 1.53   | -1.57  | 1.3    | 2.08  | -3.33  | -1.13  | 1.04   |
| <i>hsa-miR-29c-3p</i>  | 1.39  | 1.35  | -1.43 | 1.17   | -1.09 | -1.11  | 1.08   | -1.04  | 1.52   | -1.38  | 1.4    | 3     | -2.47  | 1.02   | -1.07  |
| <i>hsa-miR-302b-3p</i> | -2    | -1.68 | -1.37 | 1.01   | 1.12  | -1.22  | 2.54   | 2.29   | 1.98   | 1.81   | 1.66   | 1.51  | 3.43   | 2.25   | 2.16   |
| <i>hsa-miR-30a-5p</i>  | 1.17  | 1.25  | -1.66 | 1.44   | -1.07 | 1.35   | 1.05   | -1.17  | 1.42   | 1.03   | 2.15   | 2.17  | -2.55  | 1.16   | 2.47   |
| <i>hsa-miR-31-5p</i>   | -1    | 1.22  | -1.68 | 1.12   | -1.26 | -1.35  | 1.16   | 1.17   | 1.92   | 2.38   | 1.17   | 1.18  | 1.18   | -1.12  | -1.06  |
| <i>hsa-miR-324-3p</i>  | 1.26  | 1.32  | 1     | -1.03  | -1.26 | 1.03   | 1.34   | 1.18   | 1.3    | 3.82   | 2.41   | 2.16  | 1.57   | 1.77   | -1.23  |
| <i>hsa-miR-324-5p</i>  | 1.1   | -1.01 | -1.19 | -1.07  | -1.5  | -1.33  | 1.09   | -1.16  | 1.3    | 1.41   | 1.56   | 1.51  | -1.14  | -1.19  | 2.16   |
| <i>hsa-miR-325</i>     | -2    | -1.87 | -1.37 | 1.01   | 1.12  | -1.22  | 2.54   | 2.29   | 1.98   | 1.81   | 1.66   | 2.25  | 3.43   | 2.25   | -1.2   |
| <i>hsa-miR-32-5p</i>   | 1.73  | 1.24  | 1.84  | 1.32   | 1.45  | 1.93   | 1.13   | -1.09  | 2.03   | -3.5   | 1.18   | 5.68  | -3.09  | 2.31   | 57.13  |
| <i>hsa-miR-328-3p</i>  | 1.02  | 1.03  | 1.78  | -1.3   | -1.45 | 1.44   | 1.8    | 1.86   | 2.35   | 3.32   | 4.08   | 51.58 | 2.04   | 3      | 173.92 |
| <i>hsa-miR-335-5p</i>  | -1.01 | -2.11 | -3.01 | 1.2    | -1.68 | 1.19   | 1.19   | 1.62   | 1.45   | -1     | 1.62   | 2.3   | -1.93  | 1.67   | 1.59   |
| <i>hsa-miR-338-5p</i>  | -2    | -1.05 | -1.37 | -9.15  | -8.26 | -11.24 | 2.54   | 2.29   | 1.98   | 1.81   | 1.66   | 2.84  | 3.43   | 2.25   | 2.59   |
| <i>hsa-miR-34a-5p</i>  | 1.23  | 1.16  | -1.17 | 1.14   | -1.1  | -1.04  | 1.19   | 1.03   | 1.56   | -1.1   | 1.4    | 2.7   | -2.13  | 1.38   | 1.16   |
| <i>hsa-miR-372-3p</i>  | -2    | -1.15 | -1.37 | 1.01   | 1.12  | -1.22  | 2.54   | 2.29   | 1.98   | 1.81   | 1.66   | 1.98  | 3.43   | 2.25   | 27.29  |
| <i>hsa-miR-375</i>     | -2    | -1.12 | -1.37 | 1.01   | 1.12  | -1.22  | 2.54   | 2.29   | 59.17  | 1.81   | 1.66   | 23.71 | 3.43   | 2.25   | 114.48 |
| <i>hsa-miR-377-3p</i>  | 1.04  | 1.05  | -1.53 | 1.01   | -1.42 | 1.03   | -1.47  | -2.1   | 1.2    | -1.93  | 1.21   | -9.04 | -2.06  | -1.77  | 28.7   |
| <i>hsa-miR-378a-3p</i> | -1.3  | 1.32  | -1.39 | 1      | 1.3   | 1.18   | 1.5    | 1.84   | 2.03   | 10.32  | 2.07   | 4.33  | 1.16   | -1.31  | 1.38   |
| <i>hsa-miR-382-5p</i>  | 1.4   | 1.21  | -1.62 | 1.03   | -1.26 | 1.03   | -1.01  | 1.24   | -1.09  | 2.97   | 1.06   | 4.73  | 1.22   | -1.06  | 16.35  |
| <i>hsa-miR-449a</i>    | 34.63 | -2.98 | -1.37 | 1.01   | 1.12  | -1.22  | 2.38   | -13.33 | -35.23 | -17.23 | -18.74 | -3.04 | -10.75 | -16.42 | 1.83   |
| <i>hsa-miR-449b-5p</i> | 7.32  | -2.54 | -1.37 | 1.01   | 1.12  | -1.22  | 2.54   | 2.29   | 1.98   | 1.81   | 1.66   | 3.51  | 3.43   | 2.25   | 12.16  |
| <i>hsa-miR-451a</i>    | -2    | -1.01 | -1.37 | -1.53  | -1.38 | -1.18  | -1.95  | -2.16  | -2.49  | 6.08   | 13.13  | 1.89  | 1.86   | 193.02 | 2.47   |
| <i>hsa-miR-491-5p</i>  | -1.08 | 1.22  | 1.02  | 1.04   | 1.04  | -1     | 1.57   | 1.27   | 4.6    | 1.89   | 1.68   | 10.5  | -1.66  | 1.74   | 13.35  |
| <i>hsa-miR-5011-5p</i> | -4.62 | -4.99 | -9.89 | -92.51 | -7.77 | -33.05 | 2.95   | -1.53  | -8.26  | 6.57   | 1.17   | 1.52  | 1.26   | 6.71   | 2.19   |
| <i>hsa-miR-503-5p</i>  | 1.03  | 1.02  | -1.34 | 1.3    | -1.02 | -1.46  | -1.02  | -1.28  | 1.76   | 1.53   | 1.01   | 3.83  | 1.72   | 1.54   | 1.89   |
| <i>hsa-miR-5692a</i>   | -2    | -1.23 | -1.37 | 1.01   | 1.12  | -1.22  | 2.54   | 2.29   | 1.98   | 1.81   | 1.66   | 6.59  | 3.43   | 2.25   | 11.1   |
| <i>hsa-miR-590-5p</i>  | 1.73  | 1.54  | -1.8  | 1.43   | -1.09 | -1.59  | 1.28   | 1.76   | 2.93   | -1.37  | 1.48   | 2.9   | -1.56  | 1.66   | 2.72   |
| <i>hsa-miR-661</i>     | -2    | 1.58  | 1.23  | -1.29  | 1.55  | 4.21   | -19.01 | -1.83  | -24.29 | 2.07   | -2.61  | 12.48 | 1.17   | 9.7    | 23.61  |
| <i>hsa-miR-663a</i>    | -1.21 | 1.56  | 1.06  | -1.41  | -1.05 | -1.33  | 1.86   | 2.47   | -1.82  | 1.61   | 3.7    | 1.24  | 2.8    | 3.32   | -1.35  |
| <i>hsa-miR-744-5p</i>  | -2.27 | -2.65 | -2.04 | -1.23  | -1.38 | -1.3   | -1.58  | -1.53  | 1.2    | 2.85   | -1.58  | 1.49  | 1.21   | -1.93  | 2.18   |
| <i>hsa-miR-7-5p</i>    | 1.36  | -3.68 | -7.31 | 1.64   | 1.57  | 1.16   | 1.82   | 2.09   | 2.71   | 2.49   | 5.75   | 3.74  | 1.6    | 1.3    | 11.87  |
| <i>hsa-miR-874-3p</i>  | -1.84 | 1.54  | -1.8  | -1.06  | -1.19 | -1.54  | 1.42   | 3.41   | 5.24   | 2.24   | 3.6    | 6.45  | 1.55   | 4.12   | 6.52   |
| <i>hsa-miR-92a-3p</i>  | -1.02 | 1.45  | 1.06  | 1.11   | -1.05 | -1.05  | 1.33   | 1.63   | 1.82   | 2.48   | 2.13   | 2.84  | 1.94   | 2.19   | 2.7    |
| <i>SNORD44 (hsa)</i>   | 1.38  | 1.12  | 1.1   | 1.12   | -1.04 | -1.03  | 1.28   | 1.58   | 1.46   | 1.41   | 1.54   | 2.42  | 1.11   | 1.51   | 3.58   |
| <i>SNORD38B (hsa)</i>  | 1.51  | 1.02  | 1.77  | 1.15   | 1.05  | 1.22   | 1.52   | 1.45   | 1.76   | 1.84   | 2.55   | 1.5   | 1.18   | 1.74   | 1.71   |
| <i>SNORD49A (hsa)</i>  | 1.26  | 1.32  | -1.03 | 1.26   | 1.03  | 1.17   | 1.47   | 1.38   | 1.69   | 2.1    | 1.81   | 1.85  | 1.44   | 1.23   | 1.24   |
| <i>U6 snRNA (v2)</i>   | 1.52  | 1.45  | 1     | -1.63  | -1.29 | 1.08   | 1.09   | 1.21   | 1.18   | -1.58  | -1.73  | 1.52  | -1.84  | -1.35  | 1.69   |

(\*) *Light red*, miRNAs up-regulated between 2 and 9.99 fold. *Red*, miRNAs up-regulated >10 fold. *Light blue*, miRNAs down-regulated between -2 and -9.99 fold. *Blue*, miRNAs down-regulated >-10 fold.
